# Supplementary material
Source: Springer Nature journal article supplement (https://www.springermedizin.de/resource/supplementary/12914_2011_195_MOESM6_ESM.pdf/9537026)

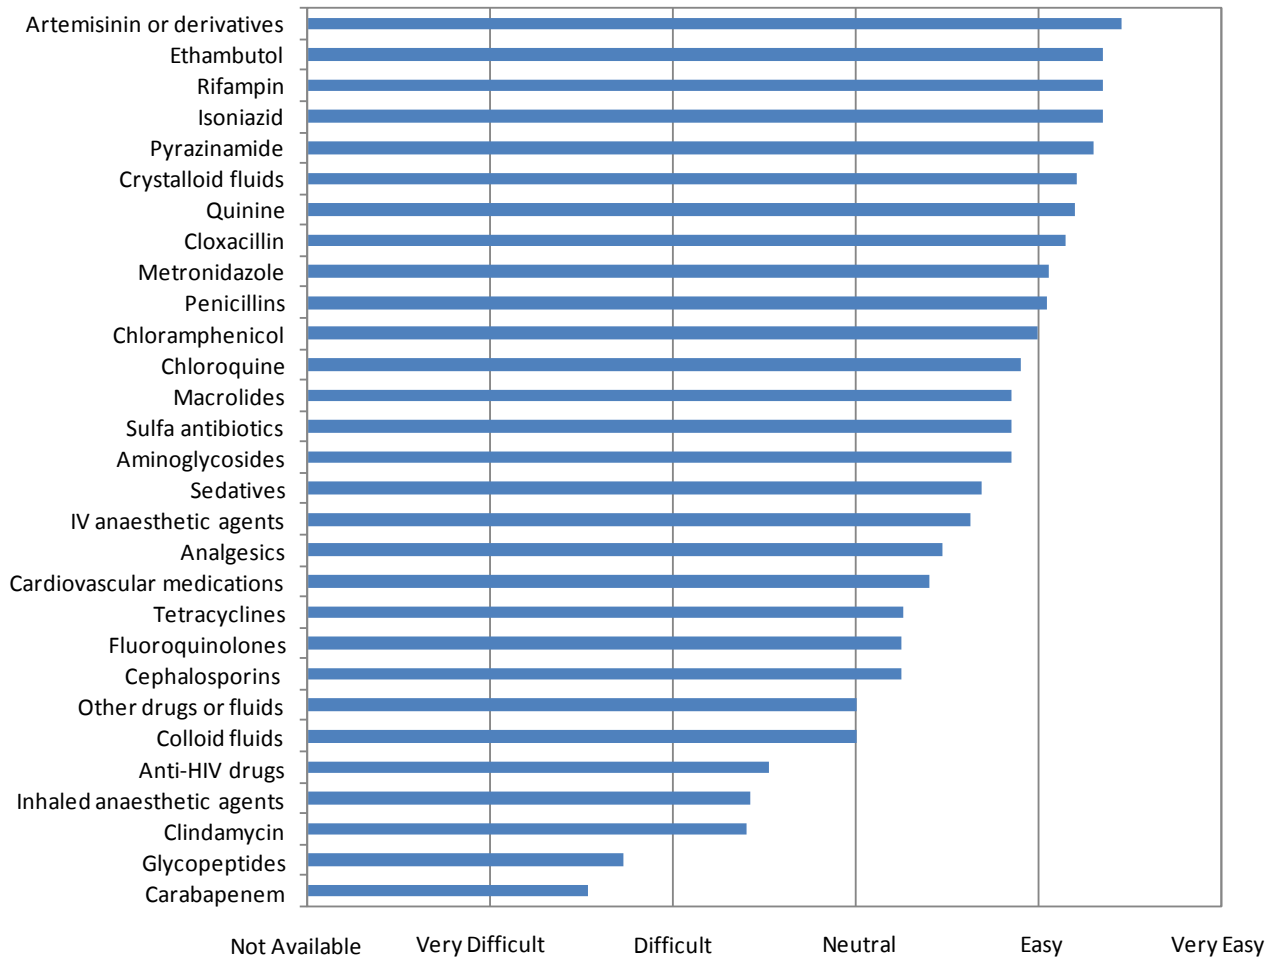

IV = Intravenous.

Supplement: MOESM6 [file 9537026]
